# Supplementary material for: The role of boron in the carrier transport improvement of CdSe-sensitized B,N,F-TiO2 nanotube solar cells: a synergistic strategy
Source: Royal Society of Chemistry journal article supplement (doi:10.1039/c8nj02716a), 2018-01-01
Supplement: c8nj02716a1.pdf [file c8nj02716a1.pdf]

## New Journal of Chemistry

### Electronic supplementary information

#### The role of boron in the carrier transport improvement of CdSe-sensitized B,N,F-TiO<sub>2</sub> nanotubes solar cells: a synergistic strategy

Andrés. F. Gualdrón-Reyes,<sup>a,b</sup> Angel M. Meléndez,<sup>b</sup> Mario Alejandro Mejía-Escobar,<sup>c</sup> Franklin Jaramillo,<sup>c</sup> and  
Martha E. Niño-Gómez<sup>\*a,b</sup>

<sup>a</sup>*Centro de Investigaciones en Catálisis (CICAT), Universidad Industrial de Santander, Sede UIS Guatiguará,  
Piedecuesta, Santander, Colombia. C.P. 681011.*

<sup>b</sup>*Centro de Investigación Científica y Tecnológica en Materiales y Nanociencias (CMN), Universidad Industrial  
de Santander, Piedecuesta, Santander,  
Colombia. C.P. 681011.*

<sup>c</sup>*Centro de Investigación, Innovación, y Desarrollo de Materiales (CIDEMAT), Facultad de Ingeniería,  
Universidad de Antioquia (UdeA), Calle 70 No. 52-21, Medellín, Colombia. C.P. 050010.*

\*Corresponding Author: mobile: +57 3156487149

Email address [marthan@uis.edu.co](mailto:marthan@uis.edu.co) (M.E. Niño-Gómez)

## 1. Characterization of light source used during photoelectrochemical measurements

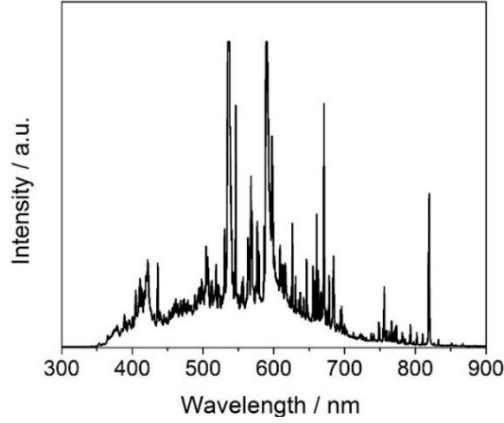

**Fig. S1** Emission spectrum of the halide lamp used in photo(electro)chemical tests ( $60 \text{ mW cm}^{-2}$ ).

## 2. Dependence of depletion layer (W) on the boron doping in the photoanodes

One alternative to observe changes in the charge carrier density by impurity doping, is through the estimation of depletion layer width (W) produced during band bending of  $\text{TiO}_2$  (See Fig. S2a). W can be determined by the following relationship taking into account the terms used in the M-S analysis:

$$W = \sqrt{\frac{2\epsilon\epsilon_0(E_{app} - E_{fb})}{eN_d}} \quad (1)$$

Here,  $e$  is the electron charge. W was plotted vs  $E_{app}-E_{fb}$  for all photoanodes, obtaining a decrease of depletion layer for  $E_{app}-E_{fb} = 1.0 \text{ V}_{\text{Ag/AgCl}}$  to vary the amount of  $\text{H}_3\text{BO}_3$  in the following order:  $0.09 \text{ wt\%} < 0.06 \text{ wt\%} < 0.04 \text{ wt\%} < \text{bare NF-TNT}$ . Some works have reported that a wide W is vital for an efficient charge carrier separation to increase the photoresponse of  $\text{TiO}_2$ .<sup>1,2</sup> Nonetheless, X-BNF-TNT showed a diminution of W (See Fig. S2b). So, ¿what allows the PEC performance of modified photoanodes increases although W is decreased by boron doping? The answer was addressed in terms of the donor species function into X-BNF-TNT formed by interstitial boron. After boron doping, the amount of  $\text{Ti}^{3+}$  species was increased than that bare NF-TNT, mediating a suitable electron-hole separation by using a  $\text{H}_3\text{BO}_3$  content of  $0.06 \text{ wt\%}$ . It is suggested that a high amount of  $\text{Ti}^{3+}$  was formed in the bulk and the depletion layer of B-photoanodes ( $N_d$  of  $0.06\text{-BNF-TNT}$  was 3.6 times higher than that NF-TNT). This modification facilitated electron-hole pair separation to generate a high photocurrent.<sup>3,4</sup> Conversely, an excess of  $\text{Ti}^{3+}$  in the bulk and W of TNT favoured charge-carrier recombination, which inhibited photoholes migration to the photoanode surface and electron transport to the current collector. On the other hand,  $E_{fb}$  can be considered as indication of the energy required to carry out charge carrier

separation. Thus, the flat band condition (absence of W) into TNT could be easily achieved at more negative values to increase the amount of  $\text{H}_3\text{BO}_3$ .

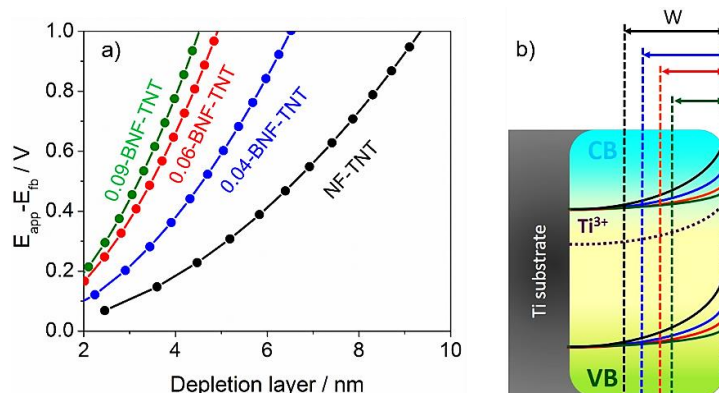

**Fig. S2** a) Depletion layer ( $W$ ) as a function of applied potential for the NF-TNT and X-BNF-TNT photoanodes, and b) schematic representation of  $W$  compaction varying the amount of  $\text{H}_3\text{BO}_3$ .

### 3. Wettability of CdSe-sensitized photoanodes

Contact angle (CA) measurements were carried out for 0.06-BNF-TNT photoanodes before (Fig. S3a) and after 5-CdSe sensitization (Fig. S3b), dropping 10  $\mu\text{L}$  of DI water on the photoanode at room temperature. Bare BNF-TNT presented a high CA about  $93.1^\circ$ , which indicates a low wettability in its surface. The high surface tension of water provides a poor wetting ability on the solid surface, hindering the penetration of the liquid into the BNF-TNT matrix. In addition, after annealing, the hydroxyl groups in the TNT surface are replaced by oxygen molecules, which decrease their hydrophilicity.<sup>5</sup> This evidence have been considered to avoid the use of SILAR aqueous solutions to carry out sensitization processes.<sup>6</sup> Conversely, after 5-CdSe sensitization, the CA was decreased until  $53.0^\circ$ , indication of the improvement in the hydrophilicity of composite material. The chalcogenides deposition generates a more roughness surface<sup>6</sup>, facilitating the permeability of liquid. It favours an intimate contact between the composite and the electrolyte to promote the diffusion of redox species and the charge carrier transport in the photoanode/electrolyte interface.<sup>3</sup>

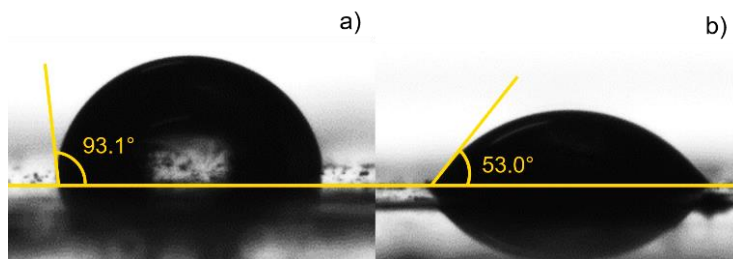

**Fig. S3.** Contact angle measurements for 0.06-BNF-TNT a) before and b) after 5-CdSe sensitization.

#### 4. Influence of boron modification and CdSe sensitization on the conducting properties of composites

As mentioned in the main manuscript, electrochemical impedance spectroscopy (EIS) spectra were acquired to investigate the interfacial charge carrier transfer behaviour into individual BNF-Y-CdSe materials. Under dark, typical Nyquist plots for each composite in function of number of SILAR cycles (Fig. S4a) were fitted to a series resistance ( $R_s$ ) and two-Randles type circuits in serie, which indicate the existence of two interfaces into the 0.06-BNF-Y-CdSe. From the impedance parameters depicted in Table S1,  $R_s$  was associated to the ITO resistance and the electrical contact from the external circuit of cell.  $R_i$  and  $CPE_1$  corresponded to the resistance and constant phase element of the ITO/BNF-Y-CdSe interface (inset of Fig. S4a), while the interfacial charge carrier resistance ( $R_{ct}$ ) and capacitance ( $CPE_2$ ) were associated to the BNF-Y-CdSe/electrolyte interface.<sup>4,7</sup> It could be noted from Table S1, that  $R_i$  showed a decrease-to-increase behaviour with the increase of SILAR cycles until 5. The declining of  $R_i$  indicates the enhancement of charge carrier transfer from CdSe to BNF-TNT assisted by the type-II heterojunction in the BNF-TNT/CdSe interface.

Moreover, the  $R_{ct}$  also displayed a notable decrease to sensitize the BNF-TNT with 5-CdSe, which means an effective photogenerated electron hole pairs separation inside CdSe mediated by  $Ti^{3+}$  donor states, and the inhibition of electron recombination with the  $S^{2-}$  based electrolyte.<sup>8,9</sup> In addition, the accumulation of electrons in the heterostructure was promoted, leading to the highest  $CPE_2$ . Conversely, upon 6-CdSe sensitization,  $R_i$  and  $R_{ct}$  were increased, as result of a low electron recombination resistance into the heterostructure, and the photoanode/electrolyte interface. It facilitates fast electron recombination in CdSe with the electrolyte. This was corroborated to obtain a lower  $CPE_2$  than 5-CdSe. On the other hand, the effect of B-doping on the improvement of photogenerated charge carrier transport into the BNF-5-CdSe was also observed in EIS spectra performed under visible illumination (Fig.S4b). By comparing with a NF-5-CdSe, a decrease in  $R_i$  (inset of Fig. S4b) and  $R_{ct}$  were observed. A high  $Ti^{3+}$  content promoted by B-doping increases the charge carriers separated and transported from the B-composite photoanode/electrolyte interface to the back contact. The increase of carriers transferred from BNF-TNT to CdSe into BNF-5-CdSe was corroborated by a higher  $CPE_2$  than that NF-5-CdSe composite.

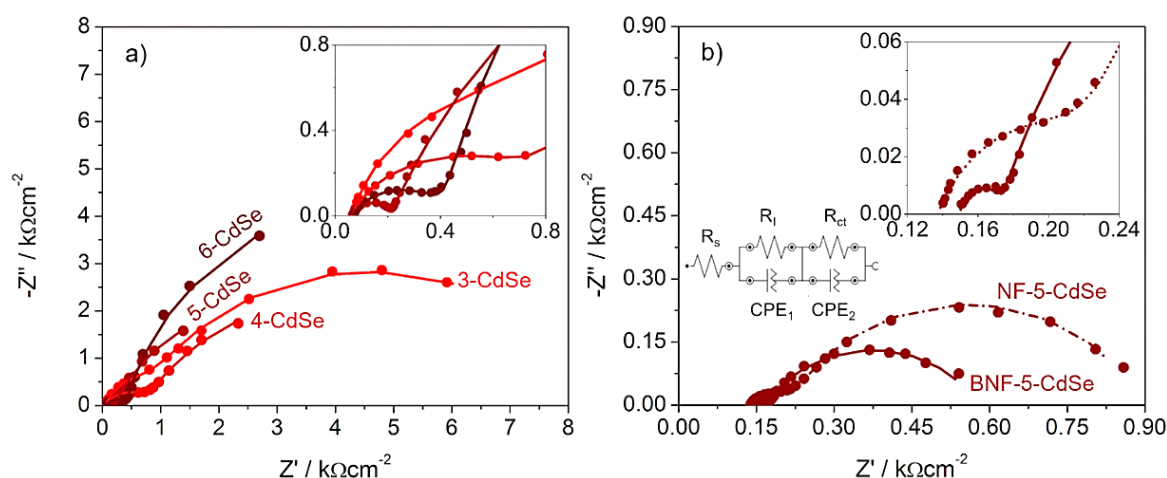

**Fig. S4** Electrochemical impedance spectroscopy (EIS) spectra (10 kHz-0.01Hz) for a) BNF-Y-CdSe photoanodes under dark. b) EIS spectra of NF-5-CdSe and BNF-5-CdSe composites under visible light. Electrolyte: 1.0 M Na<sub>2</sub>S (pH 12). Insets of Fig. S4a,b show the Nyquist plots at high frequencies for the composites and the equivalent circuit after EIS spectra.

**Table S1.** Parameters determined from EIS fitting of NF-5-CdSe and BNF-Y-CdSe sensitized composites

| Photoanode        | $R_s / \Omega\text{cm}^{-2}$ | $R_i / \Omega\text{cm}^{-2}$ | $R_{ct} / \Omega\text{cm}^{-2}$ | $CPE_1 / \mu\text{Fcm}^{-2}$ | $CPE_2 / \mu\text{Fcm}^{-2}$ |
|-------------------|------------------------------|------------------------------|---------------------------------|------------------------------|------------------------------|
| 3-CdSe, dark      | 68                           | 697                          | 7742                            | 67                           | 238                          |
| 4-CdSe, dark      | 63                           | 675                          | 7205                            | 53                           | 954                          |
| 5-CdSe, dark      | 66                           | 145                          | 6583                            | 11                           | 1267                         |
| 6-CdSe, dark      | 67                           | 344                          | 11423                           | 34                           | 692                          |
| NF-5-CdSe, light  | 137                          | 92                           | 660                             | 348                          | 2344                         |
| BNF-5-CdSe, light | 150                          | 23                           | 403                             | 106                          | 3803                         |

## References

- [1] R. Gakhar, R. Y. Smith, M. Misra and D. Chidambaram, *Appl. Surf. Sci.*, 2015, **355**, 1279.
- [2] J. Cao, Y. Zhang, H. Tuan, P. Li, T. Kako and J. Ye, *Chem. Commun.*, 2012, **48**, 8649.
- [3] J. Tian, T. Shen, X. Liu, C. Fei, L. Lv and G. Cao, *Sci. Rep.*, 2016, **6**, 23094.
- [4] G. Ai, R. Mo, H. Xu, Q. Chen, S. Yang, H. Li and J. Zhong, *J. Appl. Phys.*, 2014, **116**, 174306.
- [5] L. Yang, M. Zhang, S. Shi, J. Lv, X. Song and G. He, Z. Sun, *Nanoscale Res. Lett.*, 2014, **9**, 621.
- [6] H. Lee, M. Wang, P. Chen, D. R. Gamelin, S. M. Zakeeruddin, M. Grätzel and Md. K. Nazeeruddin, *Nano Lett.*, 2009, **9**, 4221.
- [7] M. A. Mahadik, P. S. Shinde, M. Cho and J. S. Jang, *J. Mater. Chem. A*, 2015, **3**, 23597.
- [8] M. A. Becker, J. G. Radich, B. A. Bunker and P. V. Kamat, *J. Phys. Chem. Lett.*, 2014, **5**, 1575.
- [9] J. Hensel, G. Wang, Y. Li and J. Z. Zhang, *Nano Lett.*, 2010, **10**, 478.
